# Supplementary material
Source: publisher figshare collection journal article supplement (https://tandf.figshare.com/ndownloader/files/17511617)
Supplement: Supplementary file 1 [file 17511617]

**Photodynamic and peptide-based strategy to inhibit Gram-positive bacterial biofilm formation**

Laura Marise de Freitas¹,²*; Esteban Nicolás Lorenzón³; Eduardo Maffud Cilli4; Kleber Thiago de Oliveira5; Carla Raquel Fontana¹; Thomas S. Mang²

¹São Paulo State University (Unesp), School of Pharmaceutical Sciences, Araraquara, SP, Rodovia Araraquara-Jau, km 1, Campus Ville, 14800-903, Brazil; lfmarise@gmail.com; fontanacr@fcfar.unesp.br.

²Department of Oral and Maxillofacial Surgery, University at Buffalo School of Dental Medicine, 3435 Main St, Buffalo, New York 14214, lfmarise@gmail.com; tsmang@buffalo.edu.

³Federal University of Goiás, Biological Sciences Institute, Biochemistry and Molecular biology department. Campus II Samambaia, 74690-900 - Goiania, GO – Brazil; estebanlorenzon@hotmail.com.

4São Paulo State University (Unesp), Institute of Chemistry, Araraquara, SP, Rua Prof. Francisco Degni, 55, Quitandinha, 14800-060, Brazil; eduardocilli@gmail.com.

5Federal University of São Carlos (UFSCar), Department of Chemistry, Bio-Organic Chemistry Laboratory, Rodovia Washington Luis, km 235 - SP-310, São Carlos, SP, 13565-905, Brazil; kleber.oliveira@ufscar.br.

*corresponding author: Laura Marise de Freitas; lfmarise@gmail.com.

**Supplementary Figure 1**

Comparison of cytotoxic effects of photodynamic therapy and the peptides, as monotherapies and combined, over HaCaT. The cell line, in the absence of bacteria, was treated with AU (16 μM), (AU)2K (25 μM), MB (78 μM), or Ce6 (42 μM), for 5 minutes in the dark (**A**) and was then irradiated with a 664 nm LED (**B**; 30 J/cm² for Ce6-PDT and 45 J/cm² for MBPDT). Immediately after irradiation, cells were washed to remove the treatment and incubated with MTT (0.5 mg/mL) for 3 hours (as previous published in de Freitas et al, 2014 – doi: 10.1016/j.jphotobiol.2014.08.021). Formazan crystals were solubilized with DMSO and the absorbance was read at 550 nm. Asterisks indicate the statistical difference. Columns represent the average of four independents quadruplicates and bars represent the standard deviation. ANOVA one-way, with Tukey *posthoc*. *p < 0,05; **p < 0,01; ***p < 0,001.

AU: aureína 1.2

(AU)2K: C-terminal dimer of aurein 1.2

Ce6: chlorin-e6

MB: methylene blue

PDT: photodynamic therapy
